# Supplementary material for: Identifying a Li-rich superionic conductor from charge–discharge structural evolution study: Li2MnO3
Source: Royal Society of Chemistry journal article supplement (doi:10.1039/d0cp05874b), 2021-01-01
Supplement: d0cp05874b1.pdf [file d0cp05874b1.pdf]

## SUPPLEMENTARY INFORMATION

### Identifying a Li-rich superionic conductor from charge-discharge structural evolution study: $\text{Li}_2\text{MnO}_3$

Xiaofeng Zhang, Feng Zheng\*, Shunqing Wu\*, Zizhong Zhu

*Department of Physics, OSED, Key Laboratory of Low Dimensional Condensed Matter Physics (Department of Education of Fujian Province), Jiujiang Research Institute, Xiamen University, Xiamen 361005, China*

\*E-mail: [zhengfeng@stu.xmu.edu.cn](mailto:zhengfeng@stu.xmu.edu.cn) (F. Zheng)

\*E-mail: [wsg@xmu.edu.cn](mailto:wsg@xmu.edu.cn) (S.Q. Wu)

#### Supplementary Note

All possible lithium ions distribution within a supercell containing four formula units are considered. The formula of formation energy is defined as follows:

$$\Delta E_f = E_{\text{total}}(\text{Li}_x\text{MnO}_3) - \left[ \frac{x}{2} E_{\text{total}}(\text{Li}_2\text{MnO}_3) + \left( 1 - \frac{x}{2} \right) E_{\text{total}}(\text{MnO}_3) \right] \quad (1)$$

in which  $E_{\text{total}}$  is calculated total energy per formula unit of  $\text{Li}_x\text{MnO}_3$  ( $2 \geq x \geq 0$ ). The total energy of the initial state ( $x = 2$ ) and the final state ( $x = 0$ ) are selected as the reference points for calculating the formation energy. Furthermore, the delithiation potential is an important parameter for evaluating the performance of the cathode material, and the averaged delithiation potential associated with delithiation from the amount of  $x_2$  to  $x_1$  for  $\text{Li}_x\text{MnO}_3$  ( $2 \geq x \geq 0$ ) can be calculated by using the following expression:

$$V = - \frac{E_{\text{total}}(\text{Li}_{x_2}\text{MnO}_3) - E_{\text{total}}(\text{Li}_{x_1}\text{MnO}_3) - (x_2 - x_1)E_{\text{total}}(\text{Li})}{(x_2 - x_1)e} \quad (2)$$

in which  $x_2$  and  $x_1$  are the Li composition before and after the lithium extraction from the host, respectively.

**Table S1.** Structural parameters of the *t*-Li<sub>0.5</sub>MnO<sub>3</sub> and *t*-Li<sub>2</sub>MnO<sub>3</sub>.

| Property                                | <i>t</i> -Li <sub>0.5</sub> MnO <sub>3</sub> | <i>t</i> -Li <sub>2</sub> MnO <sub>3</sub> |
|-----------------------------------------|----------------------------------------------|--------------------------------------------|
| Crystal system                          | Trigonal                                     | Trigonal                                   |
| Space group                             | <i>P</i> $\bar{3}$ 1 <i>m</i>                | <i>P</i> $\bar{3}$ 1 <i>m</i>              |
| (a, b, c) (Å)                           | (5.048, 5.048, 4.104)                        | (4.928, 4.928, 5.000)                      |
| ( $\alpha$ , $\beta$ , $\gamma$ ) (deg) | (90.00, 90.00, 120.00)                       | (90.00, 90.00, 120.00)                     |
| Li1                                     |                                              | 1a (0.0000, 0.0000, 0.0000)                |
| Li2                                     | 1b (0.0000, 0.0000, 0.5000)                  | 1b (0.0000, 0.0000, 0.5000)                |
| Li3                                     |                                              | 2d (0.3333, 0.6667, 0.5000)                |
| Mn                                      | 2c (0.3333, 0.6667, 0.0000)                  | 2c (0.3333, 0.6667, 0.0000)                |
| O                                       | 6k (0.6439, 0.0000, 0.2472)                  | 6k (0.3544, 0.0000, 0.7786)                |

**Table S2.** Li-ions diffusion coefficient ( $D_{300K}$ ) and migration energy ( $E_a$ ) for various migration pathway in *m*-Li<sub>2</sub>MnO<sub>3</sub> from CI-NEB methods.

|        | $E_a$ (eV) | $D_{300K}$ (cm <sup>2</sup> /s) |
|--------|------------|---------------------------------|
| Path 1 | 0.68       | 10 <sup>-14</sup>               |
| Path 2 | 0.69       | 10 <sup>-14</sup>               |
| Path 3 | 0.70       | 10 <sup>-14</sup>               |
| Path 4 | 0.54       | 10 <sup>-12</sup>               |
| Path 5 | 0.65       | 10 <sup>-13</sup>               |

**Table S3.** Calculated volume and interlayer distance of *m*-Li<sub>2</sub>MnO<sub>3</sub> and *t*-Li<sub>2</sub>MnO<sub>3</sub>.

| System                        | Volume (Å <sup>3</sup> /f.u.) | Distance (Å) |
|-------------------------------|-------------------------------|--------------|
| <i>C</i> 2/ <i>m</i>          | 52.101                        | 4.725        |
| <i>P</i> $\bar{3}$ 1 <i>m</i> | 52.756                        | 4.994        |

**Table S4.** Calculated Li-ion migration distance (d), activation barriers ( $E_a$ ), and estimated Li-ion diffusion coefficients (D) and ion-conductivities ( $\sigma$ ) at room temperature.

| Diffusion path    | d (Å) | $E_a$ (eV) | D (cm <sup>2</sup> /s)         | $\sigma$ (S/cm)                |
|-------------------|-------|------------|--------------------------------|--------------------------------|
| A $\rightarrow$ B | 1.704 | 0.09       | 9.15 $\times$ 10 <sup>-5</sup> | 4.53                           |
| B $\rightarrow$ C | 2.713 | 0.21       | 2.40 $\times$ 10 <sup>-6</sup> | 0.36                           |
| C $\rightarrow$ D | 4.136 | 0.36       | 1.51 $\times$ 10 <sup>-8</sup> | 1.77 $\times$ 10 <sup>-3</sup> |

**Table S5.** Calculated phase equilibria for  $t$ - $\text{Li}_2\text{MnO}_3$ . The electrochemical stability window is printed in bold.

| Voltage range<br>vs $\text{Li}^+/\text{Li}$ (V) | $\Delta n_{\text{Li}}$ per formula | Phase equilibria                            |
|-------------------------------------------------|------------------------------------|---------------------------------------------|
| 0 - 1.96                                        | 4                                  | Mn, $\text{Li}_2\text{O}$                   |
| 1.96 - 2.44                                     | 1                                  | $\text{LiMnO}_2$ , $\text{Li}_2\text{O}$    |
| <b>2.44 - 3.62</b>                              | <b>0</b>                           | <b><math>\text{Li}_2\text{MnO}_3</math></b> |
| > 3.62                                          | -2                                 | $\text{MnO}_2$ , $\text{O}_2$               |

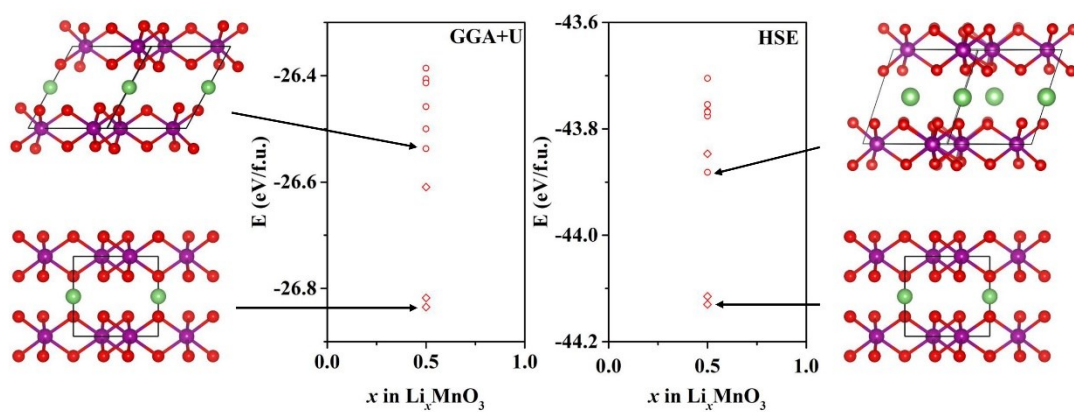

**Fig. S1.** The total energy calculated by the GGA+U and the single-point energy calculated by the HSE for  $\text{Li}_{0.5}\text{MnO}_3$ .

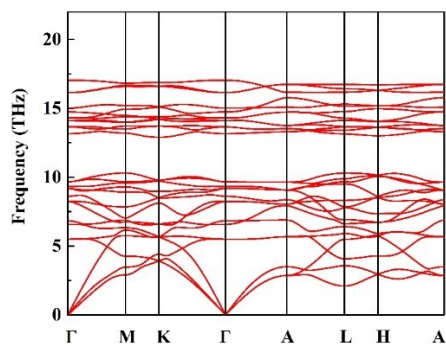

**Fig. S2.** Phonon band structure of  $t$ - $\text{Li}_{0.5}\text{MnO}_3$ .

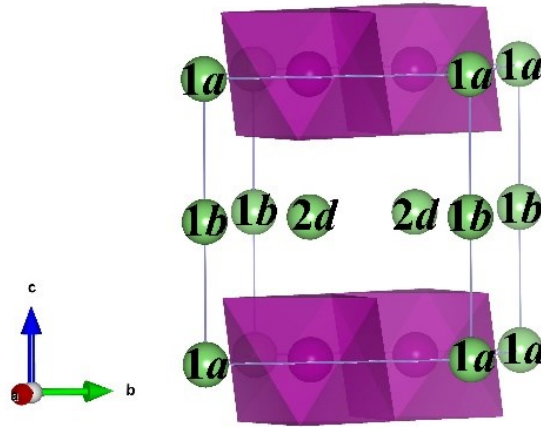

Fig. S3. Crystal structure of *t*-Li<sub>2</sub>MnO<sub>3</sub>.

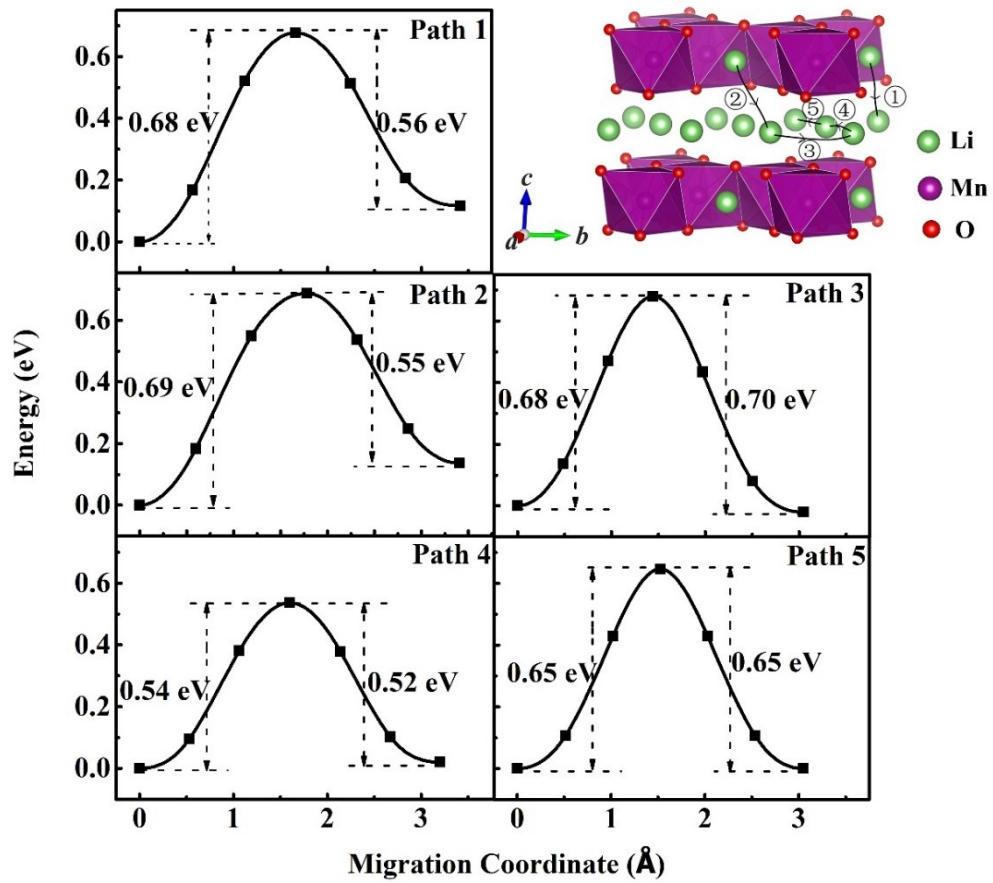

Fig. S4. Calculated kinetic properties of *m*-Li<sub>2</sub>MnO<sub>3</sub>. Li<sup>+</sup> migration channels (black arrow) and the barriers simulated by the NEB method for path 1, path 2, path3, path 4 and path 5.

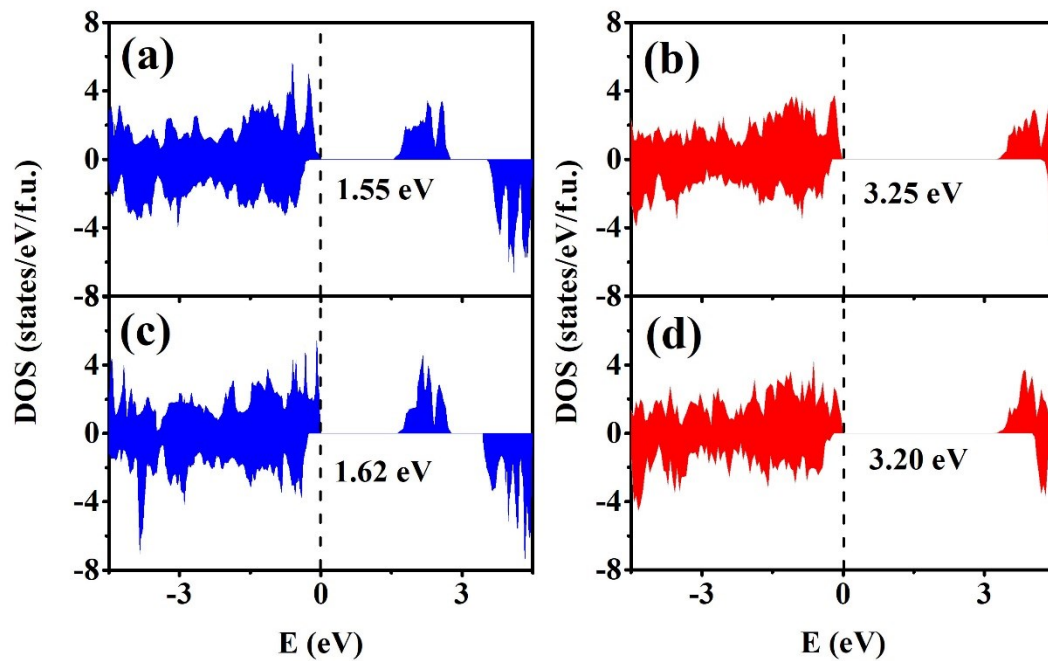

**Fig. S5.** The density of states (DOS) of  $m\text{-Li}_2\text{MnO}_3$  calculated by (a) GGA+U and (b) HSE. The density of states (DOS) of  $t\text{-Li}_2\text{MnO}_3$  calculated by (c) GGA+U and (d) HSE. The zero energy is set to the Fermi level and all energies refer to the Fermi energy. Positive and negative states represent spin-up and spin-down states, respectively.
